# Supplementary material for: EGFR Mutation Analysis of Circulating Tumor DNA Using an Improved PNA-LNA PCR Clamp Method
Source: Hindawi journal article supplement (doi:10.1155/2016/5297329), 2016-01-01
Supplement: f1 [file 5297329.f1.pdf]

## Supplemental Figure. Mechanism of PNA-LNA Clamp PCR

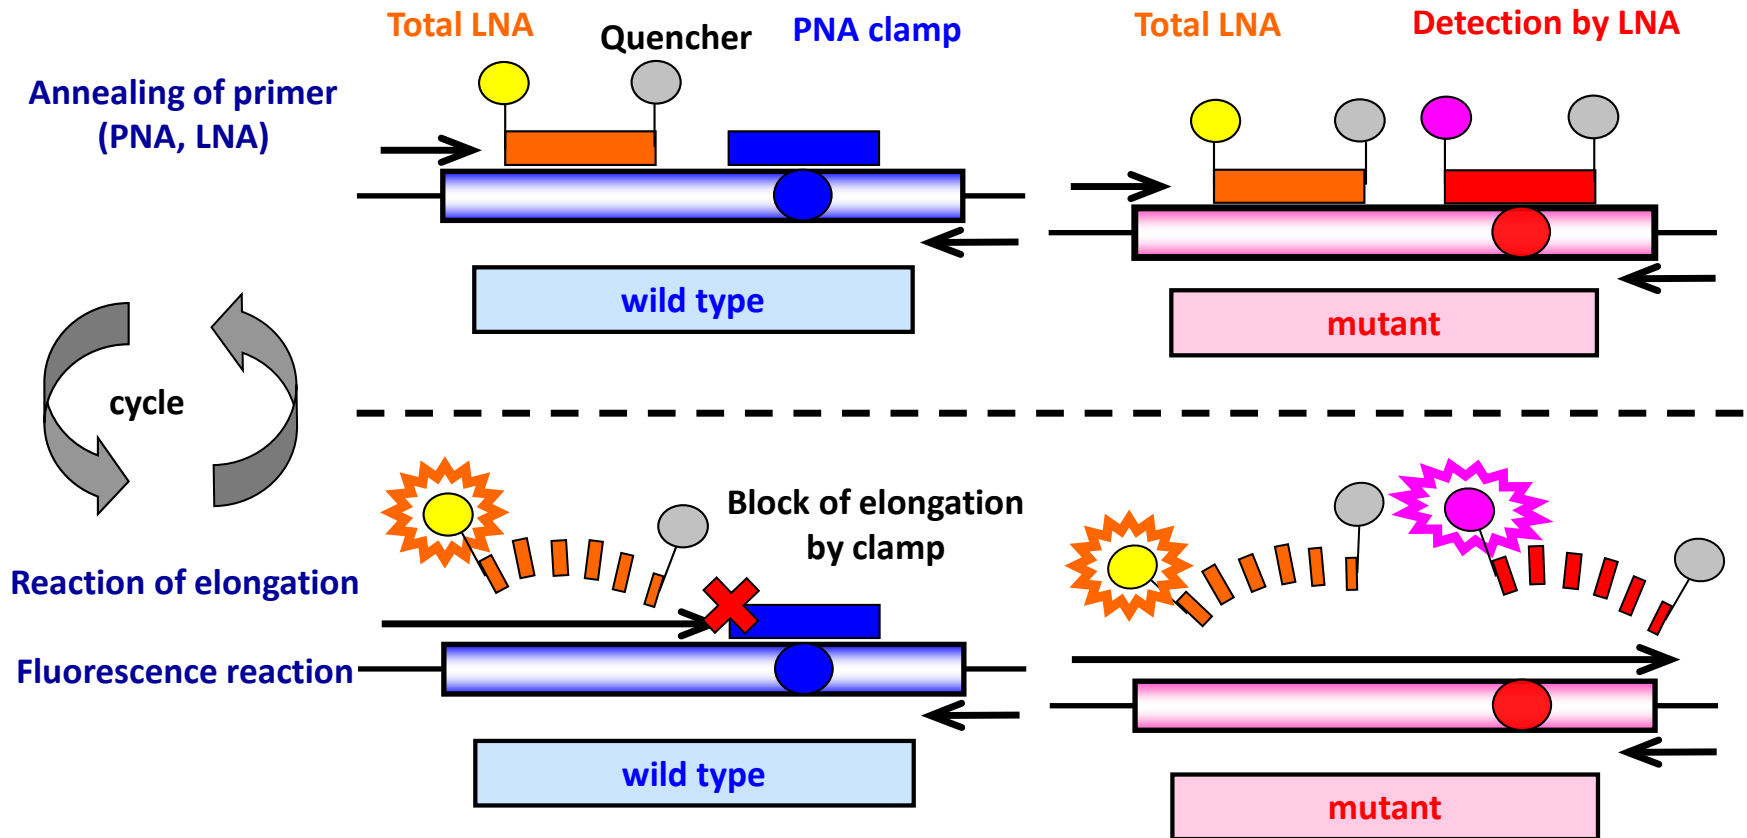

- Blocking amplification of wild type allele by PNA
- Specific detection of mutant allele by LNA

Supplemental Table 1. Primers and probes listed by assay.

|                                                                     | Oligo name                       | Oligo Sequence 5'→3'                   | Final conc.<br>(nM) |
|---------------------------------------------------------------------|----------------------------------|----------------------------------------|---------------------|
| Reaction1 (ex18 G719S, G719A, G719C)                                |                                  |                                        |                     |
| PCR primer                                                          | ex18-F                           | 5'-CTTACACCCAGTGGAGAAGC-3'             | 200                 |
|                                                                     | ex18-R                           | 5'-GGACCTTACCTTATACACCG-3'             | 200                 |
| Mutation Probe                                                      | ex18-LNA-G719S                   | 5'-Cy3/ACCGGAGC+TCAGCAC/BHQ-3'         | 100                 |
|                                                                     | ex18-LNA-G719A                   | 5'-FAM/CGGAG+G+CCAGC+A/BHQ-3'          | 100                 |
|                                                                     | ex18-LNA-G719C                   | 5'-FAM/ACCGGAGC+ACAGCAC/BHQ-3'         | 100                 |
| Total Probe                                                         | ex18-Total                       | 5'-Cy5/ CAGTTTC+CTT+CAAGA+TCCTC/BHQ-3' | 100                 |
| PNA                                                                 | ex18- PNA                        | N- GAGCCCAGCACTTT -C                   | 500                 |
| Reaction2 (ex19 E746-A750(2235-2249)del , E746-A750(2236-2250)del ) |                                  |                                        |                     |
| PCR primer                                                          | ex19-F                           | 5'-TGTCATAGGGACTCTGGATCC-3'            | 200                 |
|                                                                     | ex19-R                           | 5'-AGCAGAAACTCACATCGAG-3'              | 200                 |
| Mutation Probe                                                      | ex19-E746-A750(2235-2249)del-LNA | 5'-FAM/CTATCAA+AA+CATCTCCGAAAGC/BHQ-3' | 100                 |
|                                                                     | ex19-E746-A750(2236-2250)del-LNA | 5'-Cy3/CTATCAA+GA+CATCTCCGAAAGC/BHQ-3' | 100                 |
| Total Probe                                                         | ex19-Total                       | 5'-5Cy5/TTAA+CT+T+T+CT+CA+CCT/3BHQ-3'  | 100                 |
| PNA                                                                 | ex19 PNA                         | N- AGATGTTGCTTCTCTTAA- C               | 2500                |
| Reaction3 (ex20 T790M)                                              |                                  |                                        |                     |
| PCR primer                                                          | ex20-F                           | 5'-GCCTCACCTCCACCGTGC-3'               | 200                 |
|                                                                     | ex20-R                           | 5'-TGTTCCCGACATAGTCCAG-3'              | 200                 |
| Mutation Probe                                                      | ex20-LNA-T790M                   | 5'-FAM/CTCATCA+TGCAGCTCATG/BHQ-3'      | 100                 |
| Total Probe                                                         | ex20-Total                       | 5'-Cy5/CTT+CGGC+TGC+CTC/BHQ-3'         | 100                 |
| PNA                                                                 | Ex20 PNA                         | N- CTCATCACGCAGCTCA- C                 | 500                 |
| Reaction4 (ex21 L858R)                                              |                                  |                                        |                     |
| PCR primer                                                          | ex21-F                           | 5'-GAACGTACTGGTGAAAACACC-3'            | 200                 |
|                                                                     | ex21-R                           | 5'-GCATGGTATTCTTCTCTTCC-3'             | 200                 |
| Mutation Probe                                                      | ex21-LNA-L858R                   | 5'- FAM/TTTGGCC+CGCCCA/BHQ-3'          | 100                 |
| Total Probe                                                         | ex21-Total                       | 5'-Cy5/CAGCATGT+CAAGA+TCACAGA/BHQ-3'   | 100                 |
| PNA                                                                 | Ex21 PNA (R4)                    | N- TTTGGCCAGCCCAA- C                   | 500                 |
| Reaction5 (ex21 L861Q)                                              |                                  |                                        |                     |
| PCR primer                                                          | ex21-F                           | 5'-GAACGTACTGGTGAAAACACC-3'            | 200                 |
|                                                                     | ex21-R                           | 5'-GCATGGTATTCTTCTCTTCC-3'             | 200                 |
| Mutation Probe                                                      | ex21-LNA-L861Q                   | 5'-TET/CACCCAGC+TGTTTGGC/BHQ-3'        | 100                 |
| Total Probe                                                         | ex21-Total                       | 5'-Cy5/CAGCATGT+CAAGA+TCACAGA/BHQ-3'   | 100                 |
| PNA                                                                 | Ex21 PNA (R5)                    | N- ACCCAGCAGTTTGGC- C                  | 500                 |

Supplemental Table 2. PCR cycles

| Reaction<br>name | Stage1 |     | Stage2 |     |      |     | Cycles |
|------------------|--------|-----|--------|-----|------|-----|--------|
|                  | Temp   | sec | Temp   | sec | Temp | sec |        |
| 1, 2             | 95     | 10  | 95     | 3   | 62   | 30  | 50     |
| 3                | 95     | 10  | 95     | 3   | 58   | 30  | 50     |
| 4, 5             | 95     | 10  | 95     | 3   | 56   | 30  | 50     |
